# Supplementary material for: Optimal Serotype Compositions for Pneumococcal Conjugate Vaccination under Serotype Replacement
Source: PubMed Central journal article supplement (PMC3923658; doi:10.1371/journal.pcbi.1003477), 2014-02-13
Supplement: pcbi.1003477.s001.pdf [file pcbi.1003477.s001.pdf]

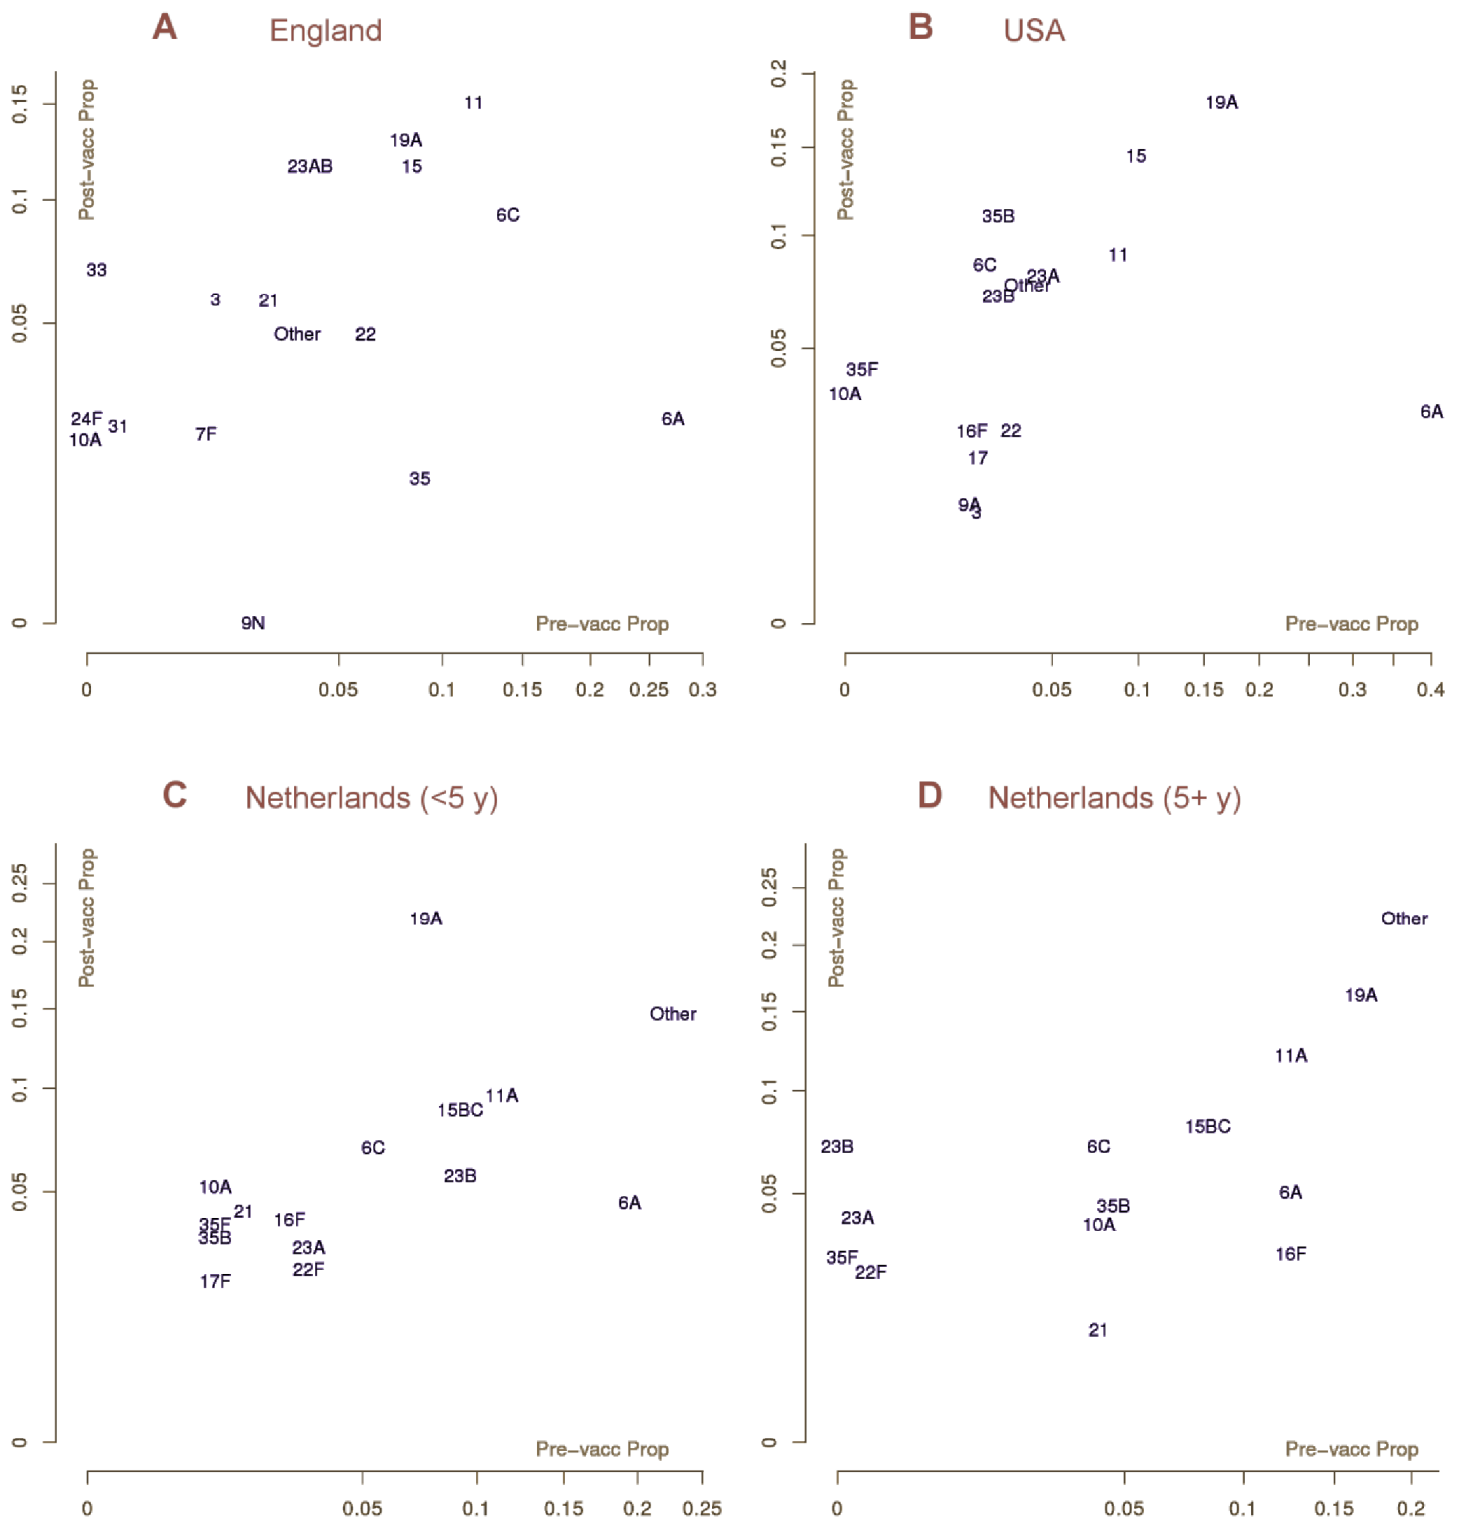

**E**

| Location                               | England                                            | USA                                          | Netherlands (children)                  | Netherlands (adults) |
|----------------------------------------|----------------------------------------------------|----------------------------------------------|-----------------------------------------|----------------------|
| Source                                 | [4] Flasche et al. (2011) Table S2 <sup>2</sup>    | [10] Shea et al. (2011) Figure 1             | [19] Spijkerman et al. (2012) Table S1  | (same)               |
| Age of participants                    | <5 year olds                                       | <3 year olds                                 | 11 & 24 m. olds                         | parents              |
| Year of pre-PCV7 study                 | 2001-2002                                          | 1999-2000                                    | 07/2005-02/2006                         | (same)               |
| PCV7 introduction                      | 09/2006                                            | 2000                                         | 06/2006                                 |                      |
| Year of post-PCV7 study                | 04/2008-11/2009                                    | 2006-2007                                    | 2009-2010                               |                      |
| N_NVT (pre-PCV7 study) <sup>1</sup>    | 228                                                | 156                                          | 185                                     | 24                   |
| N_NVT (post-PCV7 study) <sup>1</sup>   | 86                                                 | 205                                          | 635                                     | 99                   |
| Serotypes included in category "Other" | 16,17,18B,19D,20,27,28F,29,34,37,38,8 <sup>3</sup> | 7C,7F,9N,19B,21,28,31,33F,37,38 <sup>3</sup> | As in Spijkerman et al. (2012) Table S1 | (same)               |

<sup>1</sup> N\_NVT refers to the frequency of nasopharyngeal carriage isolates of non-PCV7 serotypes, excluding the "nontypeable" category.

<sup>2</sup> For the 2001-2002 English data, 67% of 6AC was allocated to 6A and 33% to 6C.

<sup>3</sup> For England and USA, serotypes were included in category "Other" if either of the two proportions (corresponding to pre- and post-vaccination study) was 0 and if the other was less than 2%.

Figure S1
