# Supplementary material for: Optimal Serotype Compositions for Pneumococcal Conjugate Vaccination under Serotype Replacement
Source: PLOS journal article supplement (doi:10.1371/journal.pcbi.1003477), 2014-02-13
Supplement: S3 (10.1371/journal.pcbi.1003477.s003) [file journal.pcbi.1003477.s003]

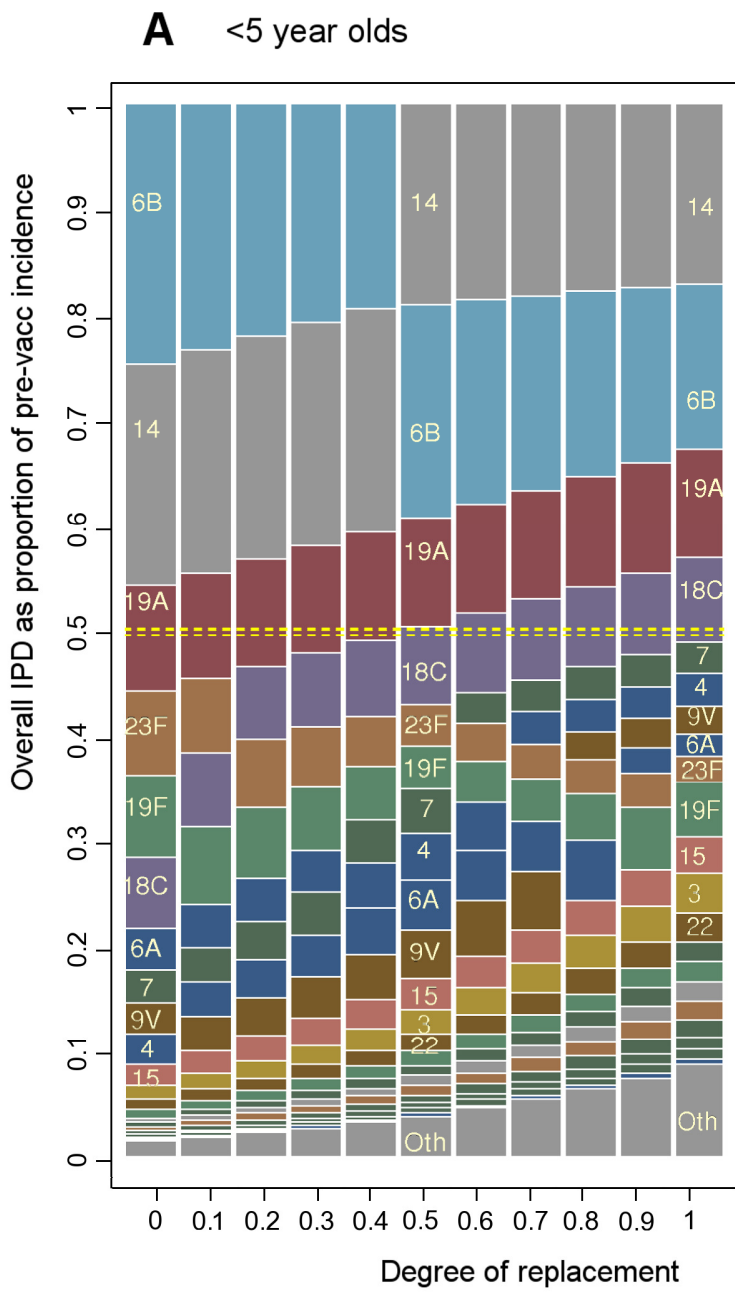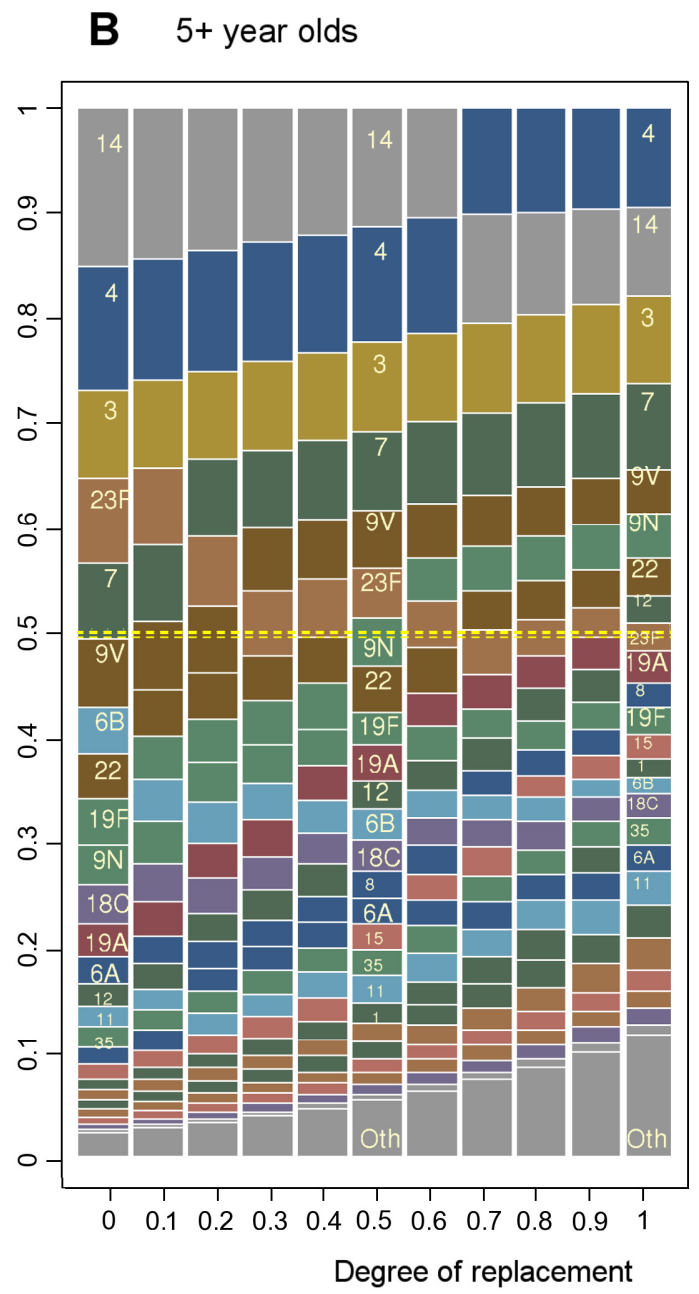

Figure S3
