# Supplementary material for: Optimal Serotype Compositions for Pneumococcal Conjugate Vaccination under Serotype Replacement
Source: PLOS journal article supplement (doi:10.1371/journal.pcbi.1003477), 2014-02-13
Supplement: S4 (10.1371/journal.pcbi.1003477.s004) [file journal.pcbi.1003477.s004]

301 Moved Permanently

# Moved Permanently

The document has moved here.

---

Apache Server at www.ploscompbiol.org Port 80
